# Supplementary material for: Isolation, Characterization, Genome Annotation, and Evaluation of Hyaluronidase Inhibitory Activity in Secondary Metabolites of Brevibacillus sp. JNUCC 41: A Comprehensive Analysis through Molecular Docking and Molecular Dynamics Simulation
Source: MDPI journal article supplement (doi:10.3390/ijms25094611), 2024-04-23

**Isolation, Characterization, Genome Annotation,  
and Evaluation of Hyaluronidase Inhibitory  
Activity in Secondary Metabolites of *Brevibacillus*  
sp. JNUCC 41: A Comprehensive Analysis  
through Molecular Docking and Molecular  
Dynamics Simulation**

**Yang Xu<sup>1</sup>, Xuhui Liang<sup>1</sup> and Chang-Gu Hyun \***

Department of Chemistry and Cosmetics, Jeju National University, Jeju 63243, Korea.

\*Correspondence: cghyun@jejunu.ac.kr; Tel.: +82-64-754-1803

# Supplementary materials

|                                                                                                                                   |    |
|-----------------------------------------------------------------------------------------------------------------------------------|----|
| Table S1. COG functional gene classification of the genome .....                                                                  | 2  |
| Table S2. A list of genetic determinants of CAZy detected in the chromosome of <i>Brevibacillus</i> sp. JNUCC 41 .....            | 3  |
| Table S3. A list of genetic determinants of virulence (VFs) detected in the chromosome of <i>Brevibacillus</i> sp. JNUCC 41 ..... | 5  |
| Table S4. ADMET properties of compounds.....                                                                                      | 6  |
| Table S5. Drug-likeness properties of compounds.....                                                                              | 7  |
| Figure S1. <sup>1</sup> H NMR of compound 1 .....                                                                                 | 8  |
| Figure S2. <sup>13</sup> C NMR of compound 1.....                                                                                 | 9  |
| Figure S3. <sup>1</sup> H NMR of compound 2 .....                                                                                 | 10 |
| Figure S4. <sup>13</sup> C NMR of compound 2 .....                                                                                | 11 |
| Figure S5. <sup>1</sup> H NMR of compound 3 .....                                                                                 | 12 |
| Figure S6. <sup>13</sup> C NMR of compound 3.....                                                                                 | 13 |
| Figure S7. <sup>1</sup> H NMR of compound 4.....                                                                                  | 14 |
| Figure S8. <sup>13</sup> C NMR of compound 4.....                                                                                 | 15 |
| Figure S9. <sup>1</sup> H NMR of compound 5 .....                                                                                 | 16 |
| Figure S10. <sup>13</sup> C NMR of compound 5.....                                                                                | 17 |

**Table S1.** COG functional gene classification of the genome

| COG_class | Description                                                   | Number |
|-----------|---------------------------------------------------------------|--------|
| J         | Translation, ribosomal structure and biogenesis               | 290    |
| A         | RNA processing and modification                               | 0      |
| K         | Transcription                                                 | 408    |
| L         | Replication, recombination and repair                         | 152    |
| B         | Chromatin structure and dynamics                              | 0      |
| D         | Cell cycle control, cell division, chromosome partitioning    | 236    |
| Y         | Nuclear structure                                             | 0      |
| V         | Defense mechanisms                                            | 116    |
| T         | Signal transduction mechanisms                                | 291    |
| M         | Cell wall/membrane/envelope biogenesis                        | 256    |
| N         | Cell motility                                                 | 47     |
| Z         | Cytoskeleton                                                  | 4      |
| W         | Extracellular structures                                      | 3      |
| U         | Intracellular trafficking, secretion, and vesicular transport | 41     |
| O         | Posttranslational modification, protein turnover, chaperones  | 188    |
| X         | Mobilome: prophages, transposons                              | 31     |
| C         | Energy production and conversion                              | 250    |
| G         | Carbohydrate transport and metabolism                         | 309    |
| E         | Amino acid transport and metabolism                           | 513    |
| F         | Nucleotide transport and metabolism                           | 142    |
| H         | Coenzyme transport and metabolism                             | 273    |
| I         | Lipid transport and metabolism                                | 274    |
| P         | Inorganic ion transport and metabolism                        | 247    |
| Q         | Secondary metabolites biosynthesis, transport and catabolism  | 118    |
| R         | General function prediction only                              | 397    |
| S         | Function unknown                                              | 220    |

**Table S2.** A list of genetic determinants of CAZy detected in the chromosome of *Brevibacillus* sp. JNUCC 41

| Gene ID    | dbCAN_sub                     | Gene ID    | dbCAN_sub       |
|------------|-------------------------------|------------|-----------------|
| QOS87884.1 | GT2(7-176)                    | QOS90431.1 | AA4(13-229)     |
| QOS87908.1 | AA4(3-228)                    | QOS90512.1 | GT51(99-282)    |
| QOS88030.1 | GT51(62-236)                  | QOS90731.1 | CE4(42-145)     |
| QOS88137.1 | CBM34(6-124)+GH13_20(173-469) | QOS91004.1 | GH18(242-517)   |
| QOS88138.1 | GH13_45(65-358)               | QOS91021.1 | GT1(180-390)    |
| QOS88139.1 | GH13_31(28-372)               | QOS91054.1 | GT2(7-97)       |
| QOS88211.1 | CE1(15-237)                   | QOS91071.1 | GT4(189-353)    |
| QOS88245.1 | GH1(2-466)                    | QOS91177.1 | GH18(154-452)   |
| QOS88275.1 | CE3(31-225)                   | QOS91197.1 | GT4(1033-1177)  |
| QOS88374.1 | CE4(82-204)                   | QOS91204.1 | GH73(959-1089)  |
| QOS88571.1 | CE4(125-249)                  | QOS91214.1 | AA1(98-488)     |
| QOS88624.1 | GH4(6-185)                    | QOS91215.1 | GH8(65-417)     |
| QOS88730.1 | GH25(7-177)                   | QOS91235.1 | GT28(202-349)   |
| QOS88860.1 | GH13_29(25-369)               | QOS91252.1 | CE4(269-389)    |
| QOS88980.1 | CE14(8-126)                   | QOS91284.1 | GT4(257-413)    |
| QOS89144.1 | GH170(1-333)                  | QOS91377.1 | GH18(131-408)   |
| QOS89145.1 | GH3(116-351)                  | QOS91399.1 | GT51(60-236)    |
| QOS89148.1 | GH109(1-152)                  | QOS91471.1 | GH13_31(28-376) |
| QOS89360.1 | AA4(6-242)                    | QOS91582.1 | GT4(184-326)    |

|            |                               |                |                |
|------------|-------------------------------|----------------|----------------|
| QOS89377.1 | AA4(4-227)                    | QOS91583.<br>1 | GT26(59-227)   |
| QOS89427.1 | GH13_14(192-506)              | QOS91586.<br>1 | GT4(203-354)   |
| QOS89451.1 | GT4(168-325)                  | QOS91590.<br>1 | GT2(38-162)    |
| QOS89455.1 | GT4(165-320)                  | QOS91684.<br>1 | GT51(62-238)   |
| QOS89460.1 | GT4(168-326)                  | QOS91706.<br>1 | CE14(8-126)    |
| QOS89474.1 | GT5(2-471)                    | QOS91766.<br>1 | GH13_5(31-371) |
| QOS89476.1 | CBM48(33-116)+GH13_9(185-485) | QOS91945.<br>1 | CE4(51-175)    |
| QOS89477.1 | GH15(17-318)                  | QOS91995.<br>1 | CE9(11-383)    |
| QOS89598.1 | GT27(61-340)                  | QOS92067.<br>1 | GT51(84-264)   |
| QOS89599.1 | GT2(5-160)                    | QOS92210.<br>1 | GH179(19-334)  |
| QOS89600.1 | GT4(406-567)                  | QOS92211.<br>1 | GH179(19-342)  |
| QOS89602.1 | GT2(5-173)+GT2(248-408)       | QOS92258.<br>1 | CBM50(29-70)   |
| QOS89608.1 | GH18(118-405)                 | QOS92305.<br>1 | CE4(56-180)    |
| QOS89692.1 | CE4(42-155)                   | QOS92331.<br>1 | AA7(21-250)    |
| QOS89707.1 | GT28(191-339)                 | QOS92425.<br>1 | AA6(2-169)     |
| QOS89754.1 | CE3(53-256)                   | QOS92473.<br>1 | GT4(256-362)   |
| QOS89782.1 | CE4(78-197)                   | QOS92609.<br>1 | CE4(34-143)    |
| QOS89808.1 | GH170(3-358)                  | QOS92619.<br>1 | GH3(115-338)   |
| QOS89809.1 | GH4(8-188)                    | QOS92655.<br>1 | CE4(117-243)   |
| QOS89888.1 | GT51(83-257)                  | QOS92740.<br>1 | GH23(105-206)  |
| QOS89916.1 | GT4(194-343)                  | QOS92746.<br>1 | GH179(18-206)  |

|            |              |            |                             |
|------------|--------------|------------|-----------------------------|
| QOS89917.1 | CE14(10-114) | QOS92800.1 | CE4(37-160)                 |
| QOS90205.1 | CE4(42-157)  | QOS92805.1 | AA6(5-195)                  |
| QOS90283.1 | GT4(201-355) | QOS92828.1 | GH171(51-408)               |
| QOS90285.1 | GT4(194-345) | QOS92853.1 | GH14(24-415)+CBM20(435-520) |

**Table S3.** A list of genetic determinants of virulence (VFs) detected in the chromosome of *Brevibacillus* sp. JNUCC 41

| VFclass        | Virulence factors                                           |      | JNUCC 41 (Prediction)                                                                                                                          |
|----------------|-------------------------------------------------------------|------|------------------------------------------------------------------------------------------------------------------------------------------------|
| Adherence      | Fibronectin-binding protein (Listeria) (fbpA)               |      | QOS88467.1                                                                                                                                     |
|                | LPS O-antigen (P. aeruginosa) (Pseudomonas)                 |      | QOS92532.1                                                                                                                                     |
|                | Streptococcal lipoprotein rotamase A (Streptococcus) (slrA) |      | QOS91396.1                                                                                                                                     |
| Enzyme         | Serine-threonine phosphatase (Listeria) (stp)               |      | QOS88478.1                                                                                                                                     |
| Immune evasion | Hyaluronic acid (HA) capsule (hasC)                         |      | QOS89457.1                                                                                                                                     |
|                | Polyglutamic acid capsule                                   | capA | QOS90628.1                                                                                                                                     |
|                |                                                             | capB | QOS90626.1                                                                                                                                     |
|                |                                                             | capC | QOS90627.1                                                                                                                                     |
|                |                                                             | capD | QOS89054.1; QOS90629.1; QOS92890.1                                                                                                             |
|                |                                                             | capE | QOS92939.1                                                                                                                                     |
|                | Polysaccharide capsule                                      |      | QOS87883.1; QOS89453.1; QOS89456.1; QOS90270.1; QOS90281.1; QOS90284.1; QOS90288.1; QOS90290.1; QOS90291.1; QOS91196.1; QOS91283.1; QOS92531.1 |
| Regulation     | LOS (Campylobacter)                                         |      | QOS91024.1                                                                                                                                     |
|                | Carbon storage regulator A (Legionella) (csrA)              |      | QOS91567.1                                                                                                                                     |
|                | CheA/CheY (Listeria) (cheY)                                 |      | QOS88534.1                                                                                                                                     |
|                | LisR/LisK (Listeria) (lisR)                                 |      | QOS91489.1                                                                                                                                     |

|                                 |                                                                             |            |
|---------------------------------|-----------------------------------------------------------------------------|------------|
| Secretion system                | T6SS-II(Klebsiella) (clpB)                                                  | QOS88168.1 |
|                                 | TTSS (yyc-yop) secretion apparatus (Yersinia) (yycN)                        | QOS88524.1 |
| Toxin                           | Hemolysin III (hlyIII)                                                      | QOS89682.1 |
|                                 | Cytolysin (Enterococcus) (cylR2)                                            | QOS90796.1 |
| Antiphagocytosis                | Capsule (Enterococcus)                                                      | QOS88554.1 |
|                                 | Capsule (Klebsiella)                                                        | QOS92091.1 |
| Iron uptake                     | ABC transporter (Corynebacterium) (fagC)                                    | QOS87867.1 |
|                                 | Achromobactin biosynthesis and transport (Pseudomonas) (cbrD)               | QOS88087.1 |
|                                 | Periplasmic binding protein-dependent ABC transport systems (Vibrio) (vctC) | QOS91480.1 |
|                                 | Pyoverdine (Pseudomonas) (pvdH)                                             | QOS91765.1 |
| Motility and export apparatus   | Flagella (Campylobacter) (fliP)                                             | QOS88536.1 |
| Nutritional factor              | Allantoin utilization (Klebsiella)                                          | QOS87959.1 |
| Other adhesion-related proteins | PDH-B (Mycoplasma) (pdhB)                                                   | QOS88033.1 |
| Stress adaptation               | Catalase (Neisseria) (katA)                                                 | QOS91358.1 |
| Surface protein anchoring       | Lipoprotein-specific signal peptidase II (Listeria) (lspA)                  | QOS88455.1 |

**Table S4.** ADMET properties of compounds

| ADMET properties            | Methyl indole-3-acetate | EGCG    |
|-----------------------------|-------------------------|---------|
| <b>Absorption</b>           |                         |         |
| Caco-2 permeability (cm/s)  | -4.459                  | -6.717  |
| P-gp inhibitor              | No                      | Yes     |
| P-gp substrate              | No                      | Yes     |
| Human intestinal absorption | 94.739%                 | 47.395% |
| <b>Distribution</b>         |                         |         |
| Plasma protein binding      | 56.817%                 | 88.242% |
| Volume distribution (L/kg)  | 0.976                   | 0.485   |

|                                             |        |        |
|---------------------------------------------|--------|--------|
| Blood–brain barrier                         | Yes    | No     |
| <b>Metabolism</b>                           |        |        |
| CYP1A2 inhibitor                            | Yes    | No     |
| CYP2C19 inhibitor                           | No     | No     |
| CYP2C9 inhibitor                            | No     | No     |
| CYP2D6 inhibitor                            | No     | No     |
| CYP3A4 inhibitor                            | No     | Yes    |
| <b>Elimination</b>                          |        |        |
| Clearance rate (mL/min/kg)                  | 10.460 | 14.450 |
| T <sub>1/2</sub> (h)                        | 0.898  | 0.496  |
| <b>Toxicity</b>                             |        |        |
| Hepatotoxicity                              | No     | No     |
| Ames toxicity                               | No     | No     |
| Skin sensitization                          | No     | No     |
| hERG inhibition                             | No     | Yes    |
| LD <sub>50</sub> of acute toxicity (mol/kg) | 2.314  | 2.522  |

LD<sub>50</sub>: lethal dose;  
CYP: cytochrome  
p450; T<sub>1/2</sub>: time  
required for plasma  
concentration of a  
drug to decrease by  
50%; hERG: human

Ether-a-go-go-Related Gene.

**Table S5.** Drug-likeness properties of compounds

| Drug-likeness properties | Methyl indole-3-acetate | EGCG    |
|--------------------------|-------------------------|---------|
| MW                       | 189.08                  | 458.38  |
| HBA                      | 3                       | 11      |
| HBD                      | 1                       | 8       |
| MR                       | 54.16                   | 112.06  |
| RB                       | 3                       | 4       |
| TPSA (Å <sup>2</sup> )   | 42.090                  | 225.060 |
| Log <i>p</i>             | 2.200                   | 1.893   |
| Lipinski's Rule          | Yes                     | No      |
| Ghose Filter             | Yes                     | Yes     |
| Veber Filter             | Yes                     | No      |
| Egan Filter              | Yes                     | No      |

MW: molecular weight; HBA: num. H-Bond acceptors; HBD: num. H-Bond donors; RB: num. rotatable bonds; MR: molar refractivity.



Methyl indole-3-acetate

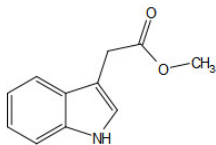

Figure S2.  $^{13}\text{C}$  NMR of compound 1

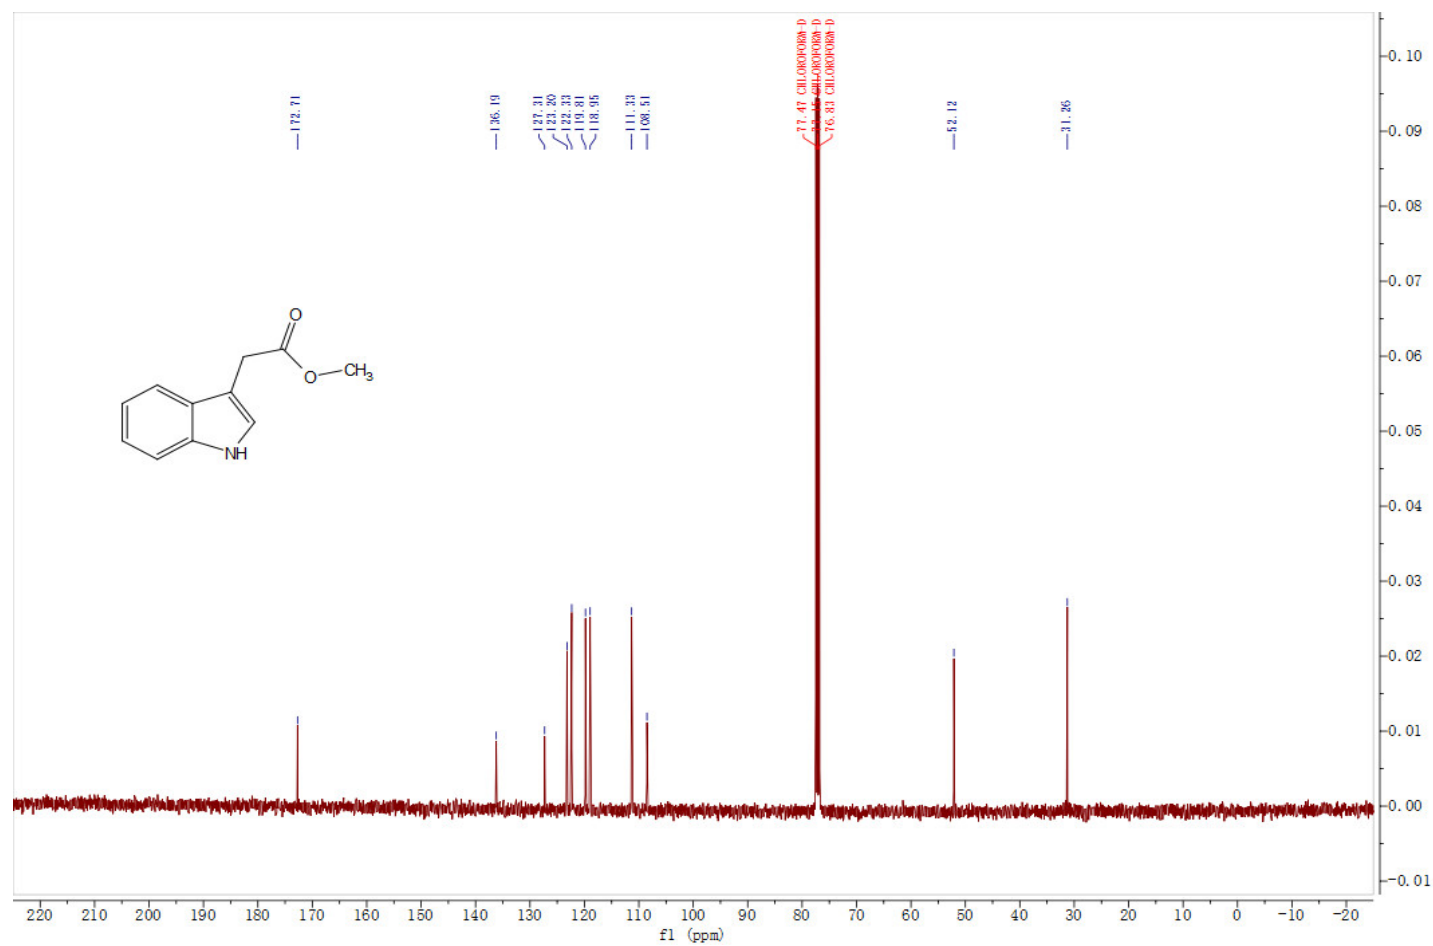

**Figure S3.**  $^1\text{H}$  NMR of compound 2

Dibutyl phthalate

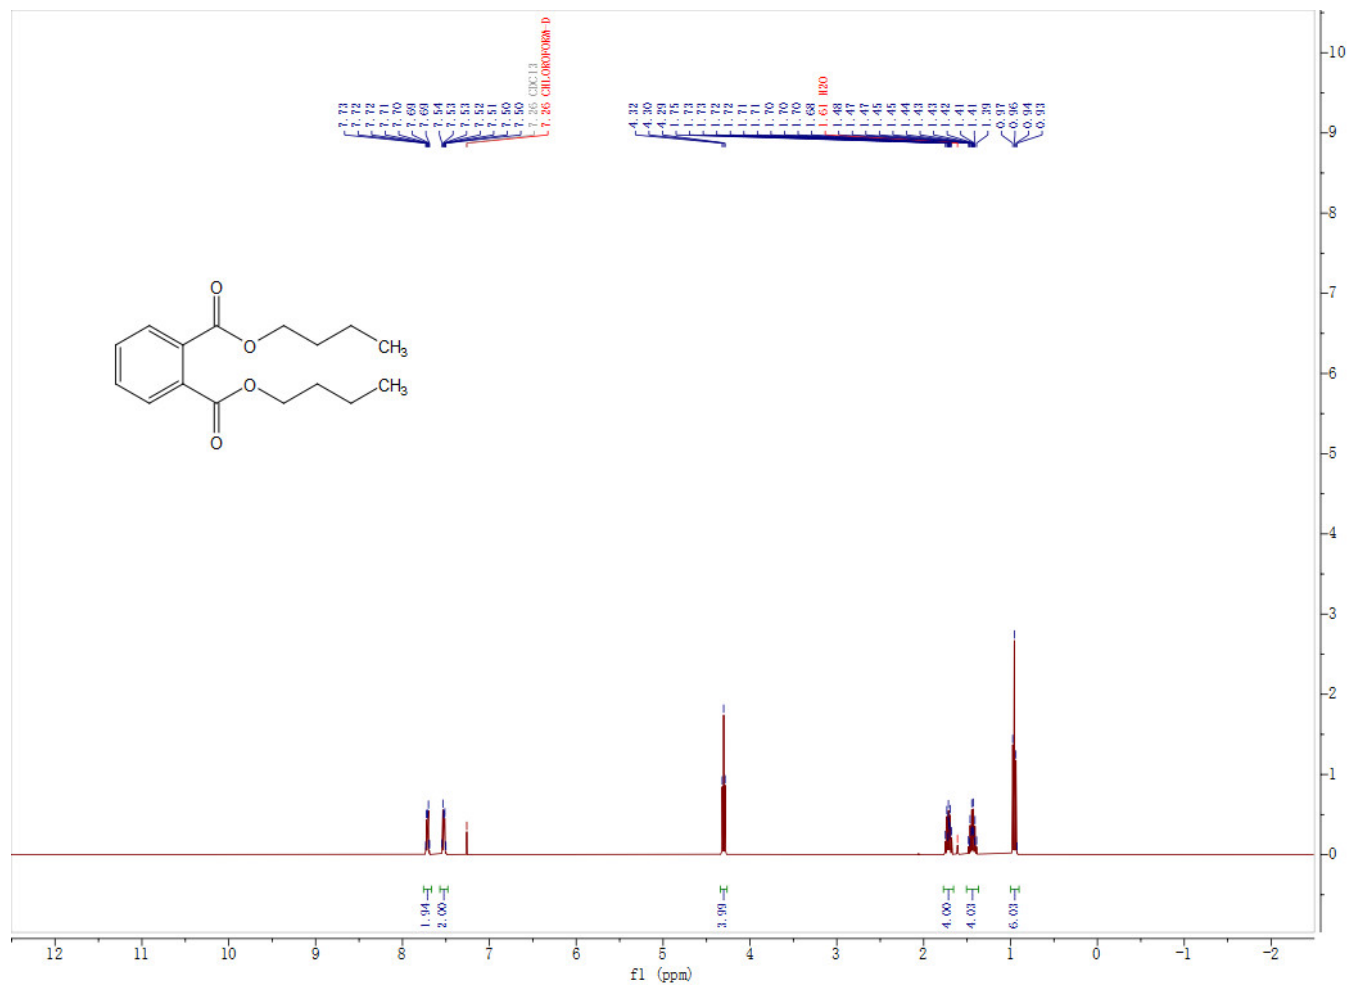

**Figure S4.**  $^{13}\text{C}$  NMR of compound 2

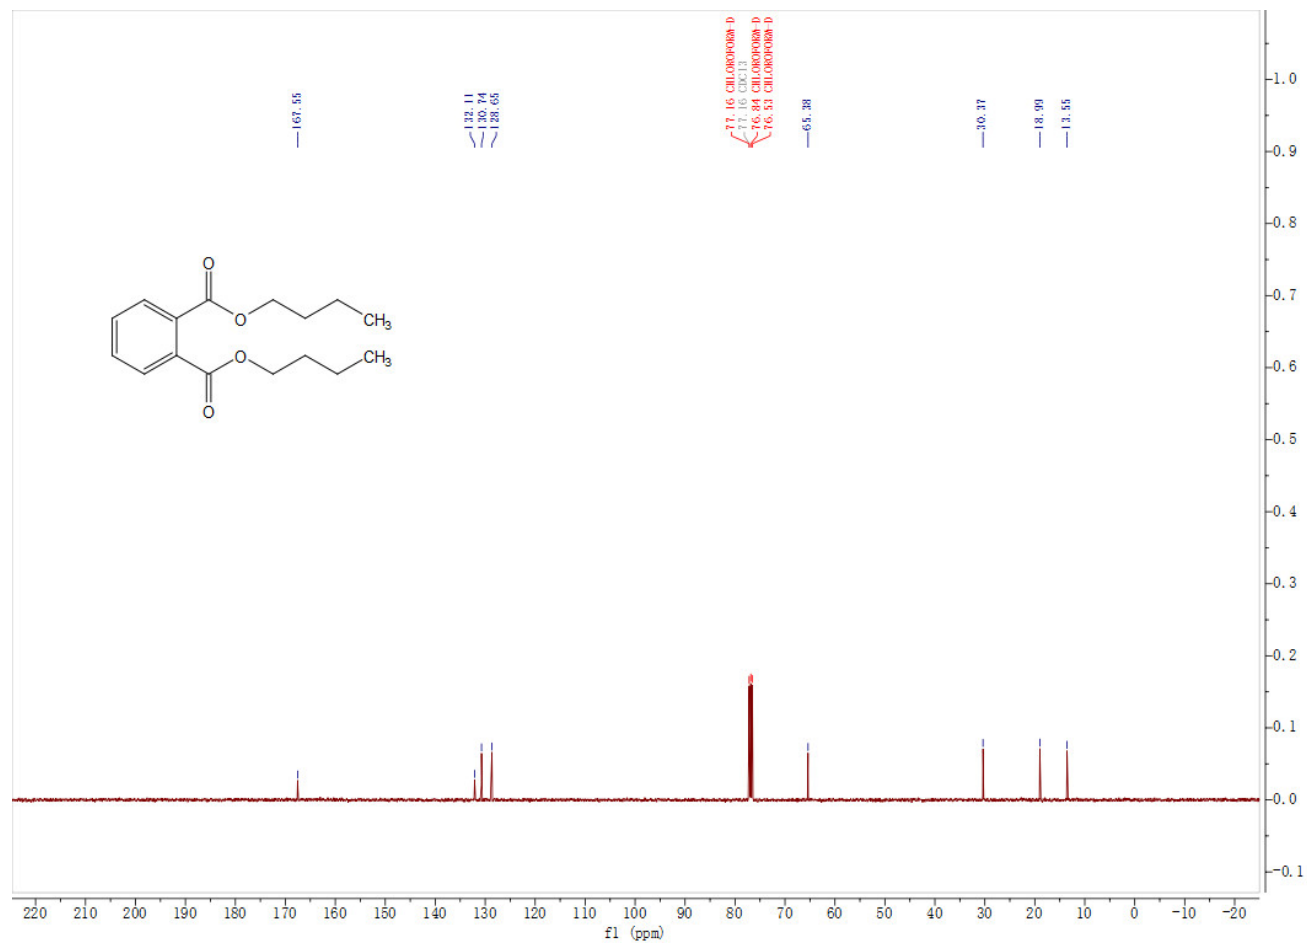

Daidzein

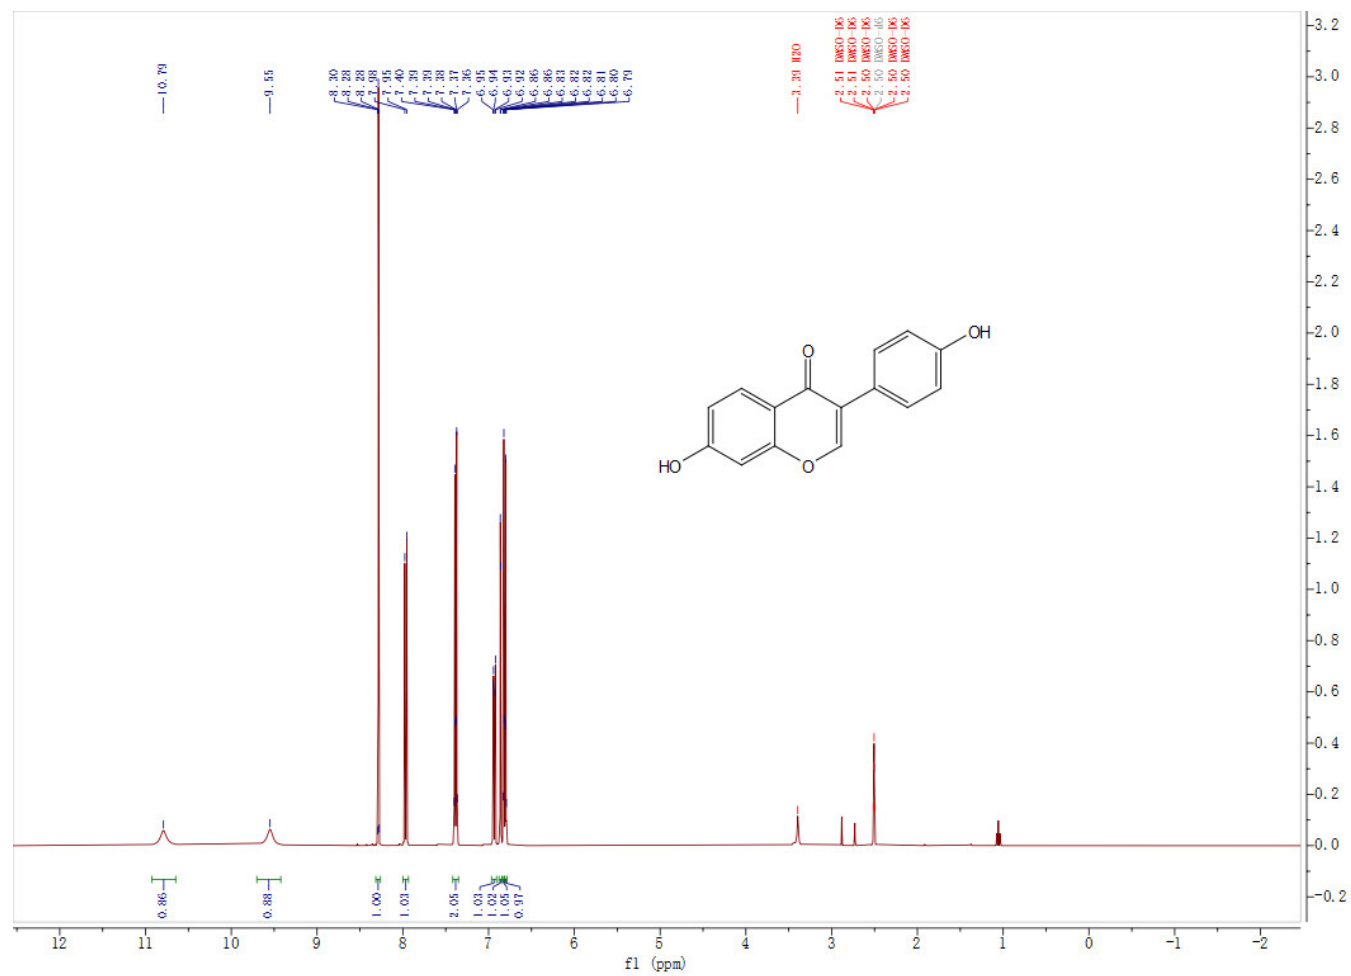

**Figure S6.**  $^{13}\text{C}$  NMR of compound 3

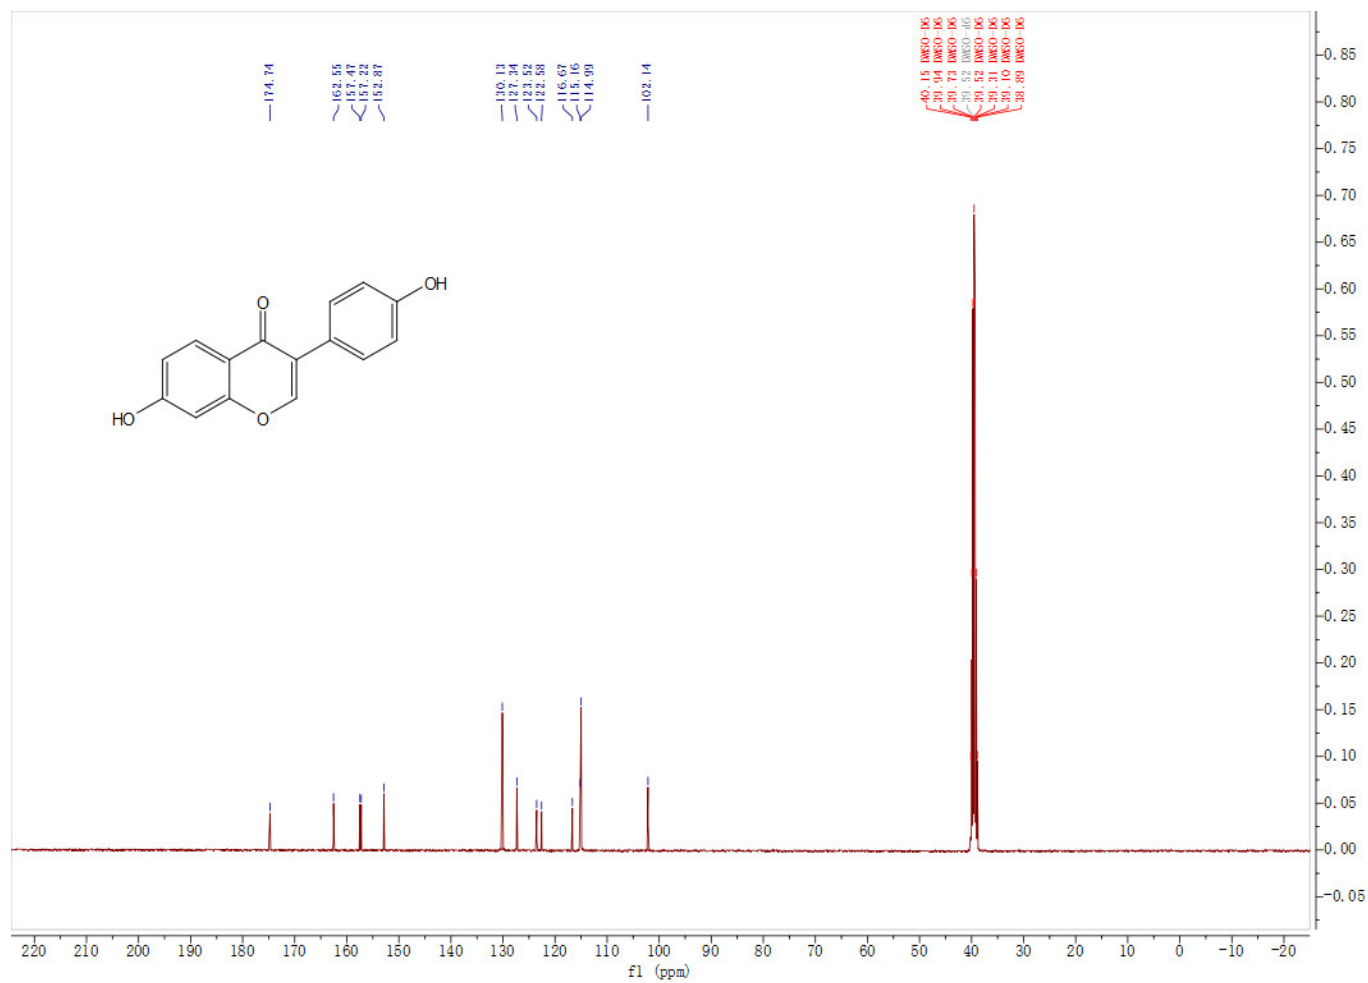

**Figure S7.**  $^1\text{H}$  NMR of compound 4

Maculosin

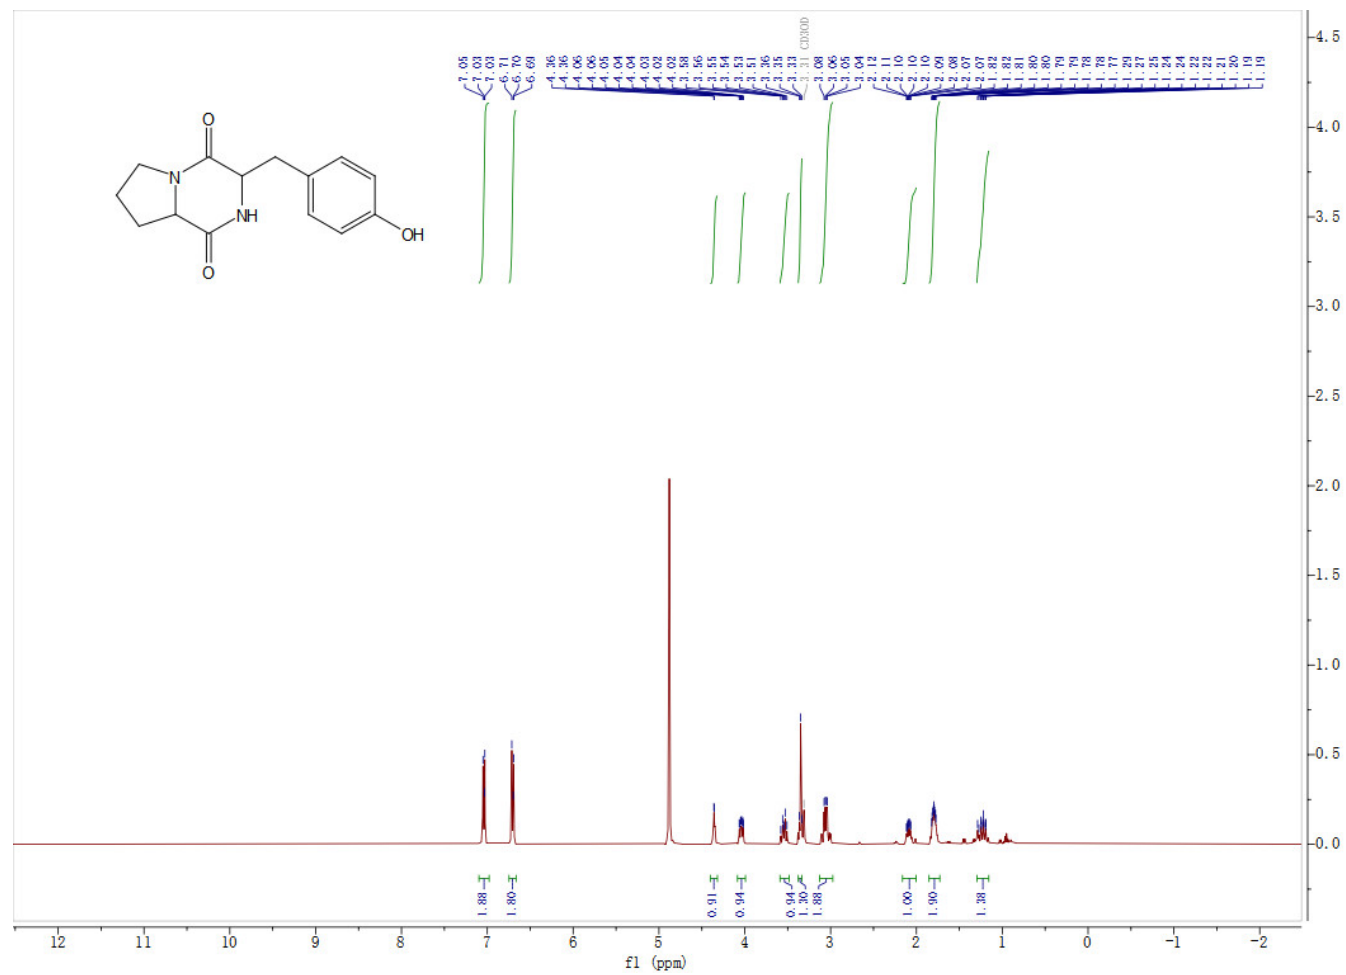

**Figure S8.**  $^{13}\text{C}$  NMR of compound 4

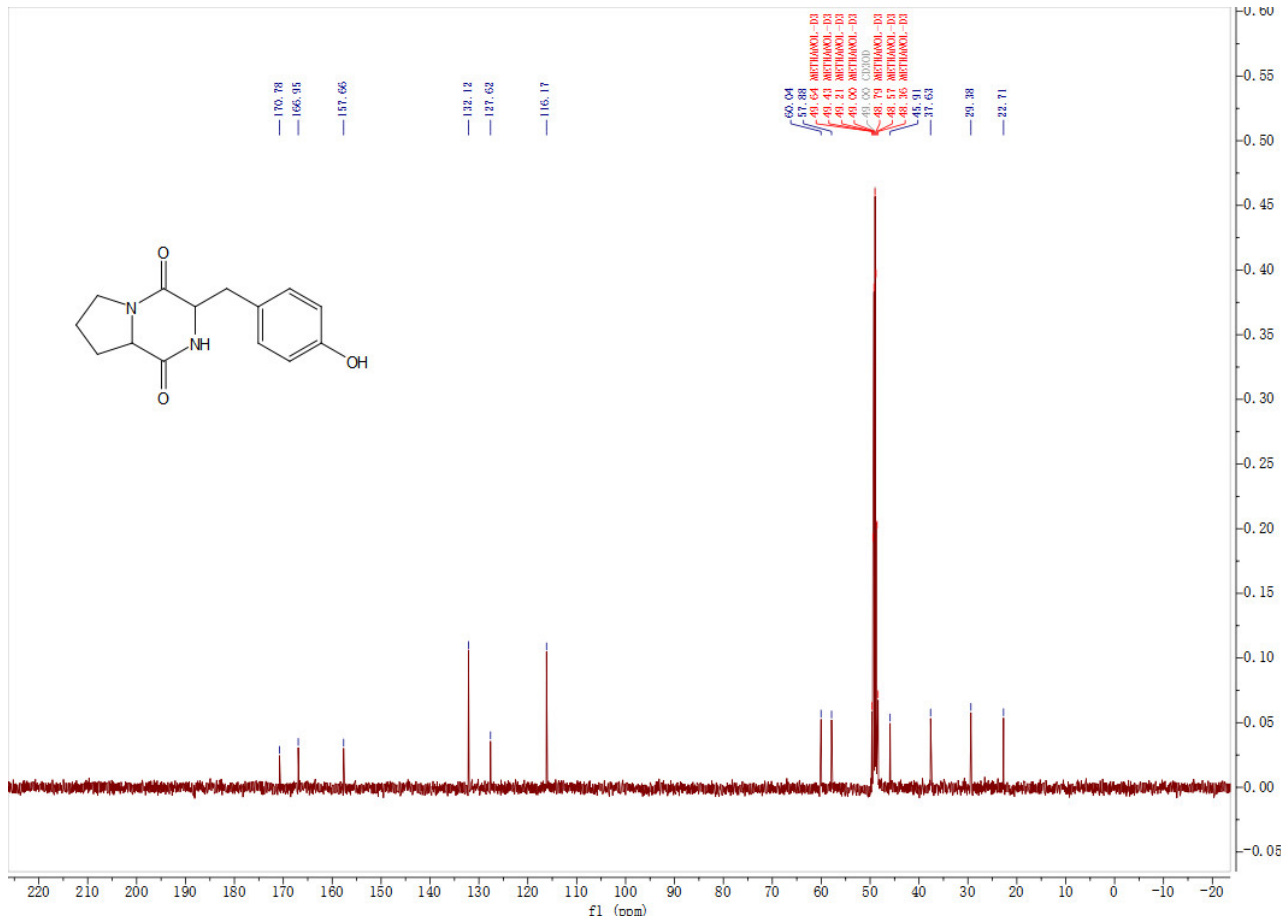



N-Acetyl-L-tryptophan

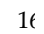

**Figure S10.**  $^{13}\text{C}$  NMR of compound 5

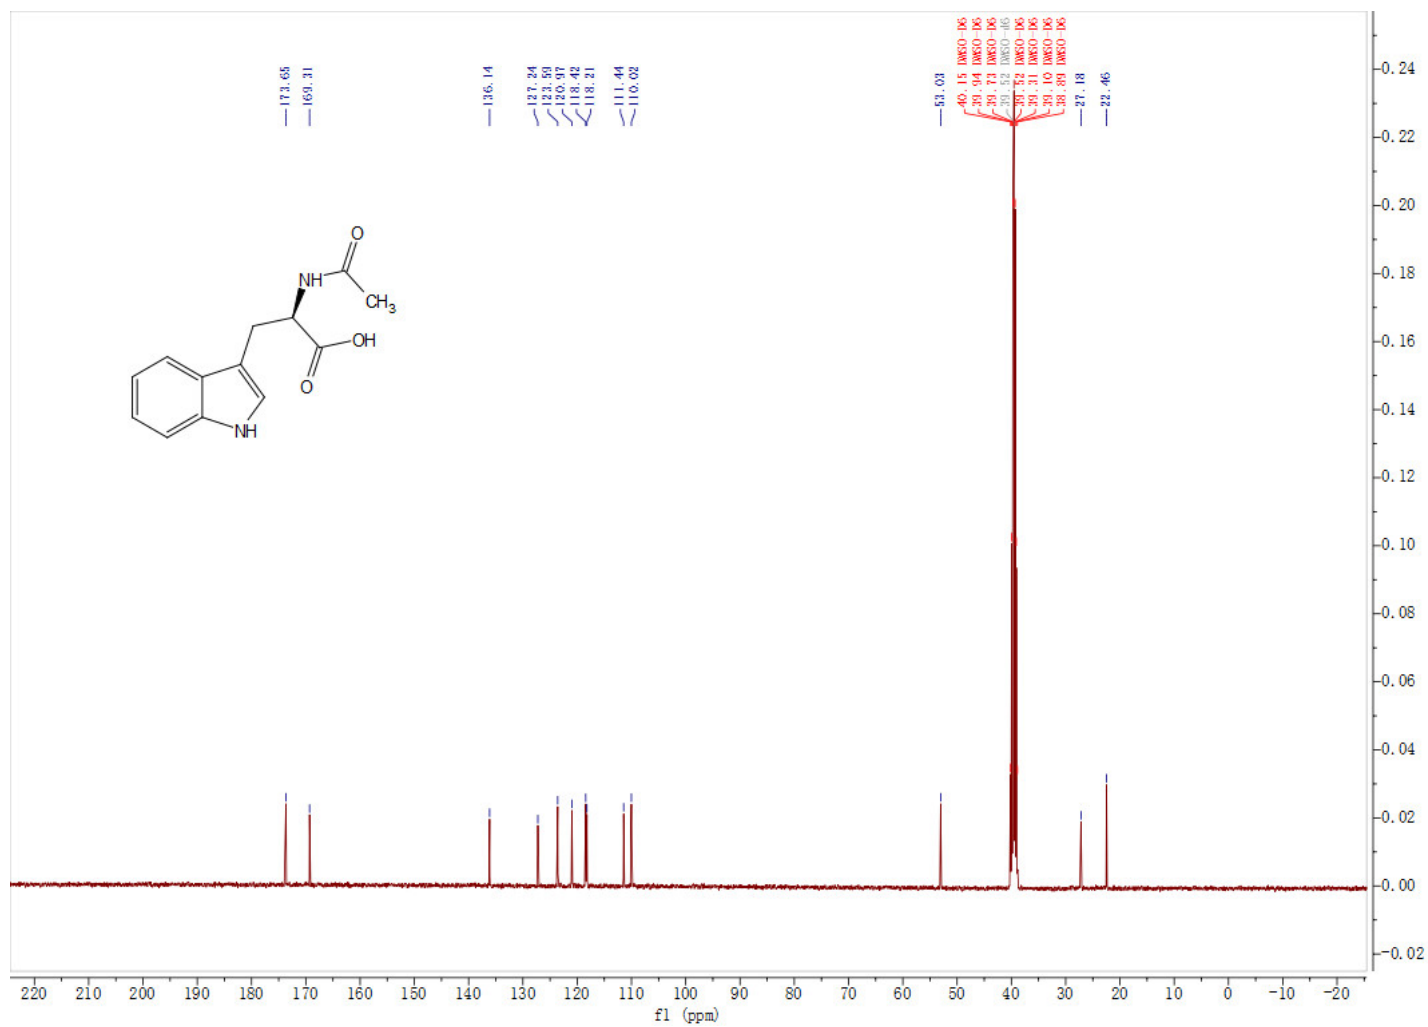

Supplement: s1 [file s1]
